# Supplementary material for: Ultralow dielectric, high performing hyperbranched epoxy thermosets: synthesis, characterization and property evaluation
Source: Royal Society of Chemistry journal article supplement (doi:10.1039/c5ra04248h), 2015-01-01
Supplement: c5ra04248h1.pdf [file c5ra04248h1.pdf]

**Electronic Supplementary Information (ESI)**

**Ultra low dielectric, high performing hyperbranched epoxy thermosets: Synthesis,  
characterization and property evaluation**

***Bibekananda De and Niranjan Karak\****

*Advanced Polymer and Nanomaterial Laboratory, Center for Polymer Science and  
Technology, Department of Chemical Sciences, Tezpur University, Napaam-784028, Assam,  
India, Fax: 91-3712-267006, Tel: 91-3712-267009, Email: [karakniranjan@gmail.com](mailto:karakniranjan@gmail.com)*

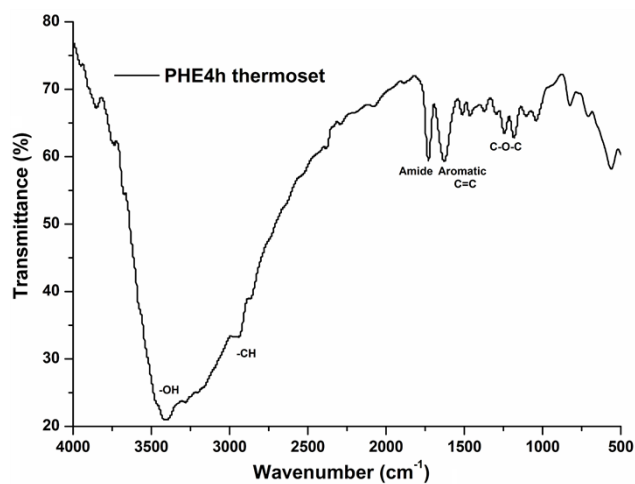

**Fig. S1** FTIR spectrum of PHE4h thermoset.

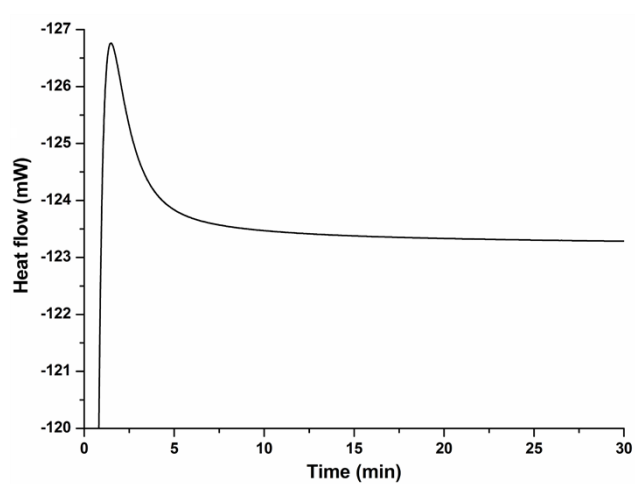

**Fig. S2** DSC curing curve of PHE4h resin.

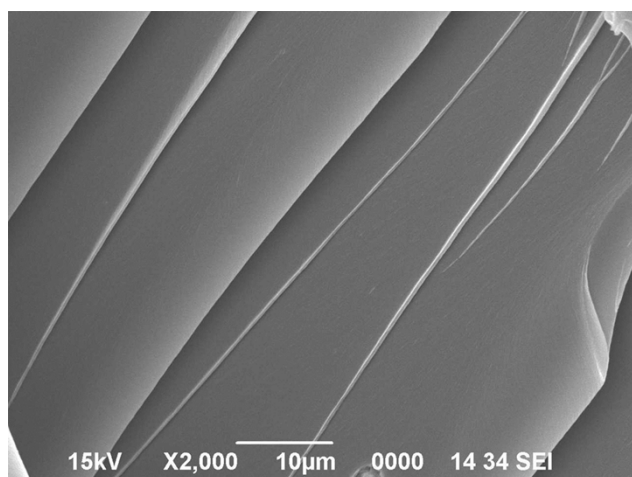

**Fig. S3** SEM micrograph of the fracture surface of PHE4h thermoset.

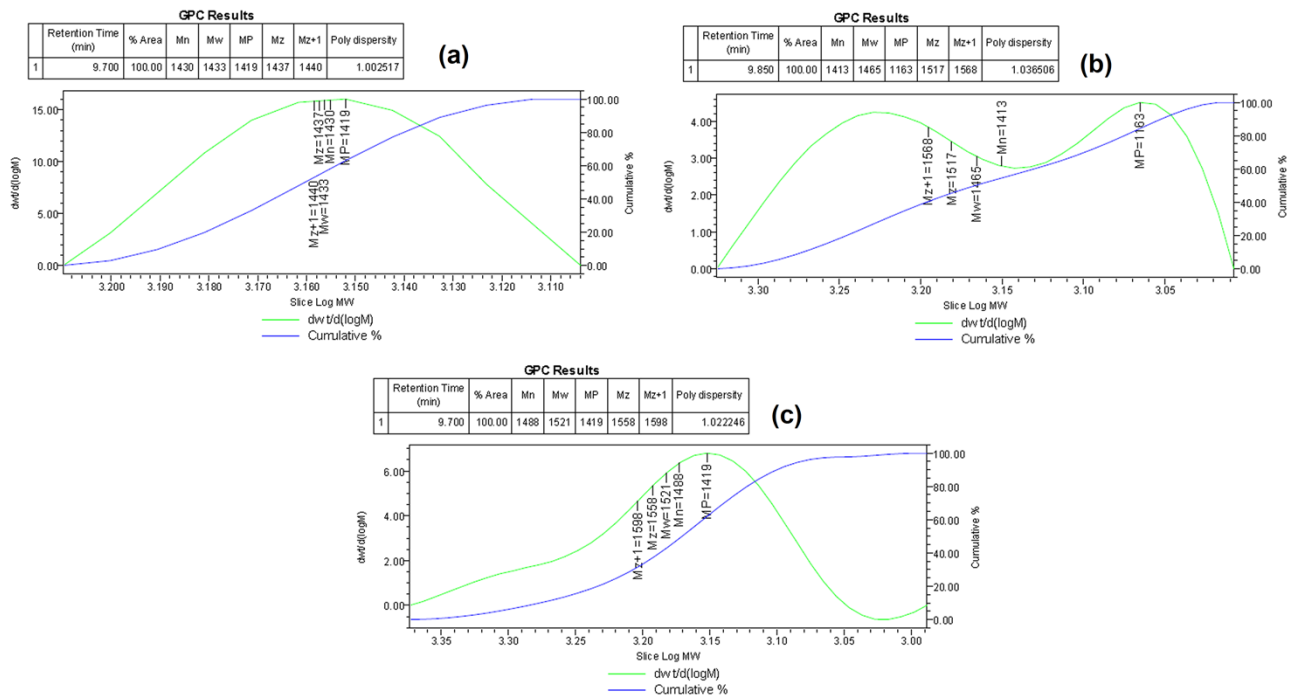

**Fig. S4** GPC results and molecular weight distribution curves for PHE4h resin obtained after three times of analyses (a-c).
